# Supplementary material for: Exploring With Transcriptomic Approaches the Underlying Mechanisms of an Essential Oil-Based Phytogenic in the Small Intestine and Liver of Pigs
Source: Front Vet Sci. 2021 Aug 11;8:650732. doi: 10.3389/fvets.2021.650732 (PMC8386756; doi:10.3389/fvets.2021.650732)
Supplement: Supplementary file 3 [file Table_2.xlsx]

## Sheet: Enriched in Control
REACTOME PATHWAYS	SIZE	ES	NES	NOM p-val	FDR q-val		Gene Set Enrichment Analysis (GSEA) report
NOREPINEPHRINE_NEUROTRANSMITTER_RELEASE_CYCLE	15	0.691972	2.72278	0	0		Generated with desktop version 4.0.3
HDMS_DEMETHYLATE_HISTONES	20	0.630773	2.24283	0	0
GLUCONEOGENESIS	32	0.584613	2.05408	0	0		SIZE	Number of genes in the pathway
ACETYLCHOLINE_NEUROTRANSMITTER_RELEASE_CYCLE	15	0.692425	2.01797	0	0		ES	Enrichment Score
FERTILIZATION	24	0.665793	1.92501	0	0		NES	Normalized Enrichment Score
GABA_SYNTHESIS_RELEASE_REUPTAKE_AND_DEGRADATION	18	0.645575	1.81657	0	0.0103024
RNA_POLYMERASE_III_CHAIN_ELONGATION	15	0.421253	1.70974	0	0.0349755
NICOTINAMIDE_SALVAGING	16	0.539309	1.68481	0.2	0.0680497
SEROTONIN_NEUROTRANSMITTER_RELEASE_CYCLE	16	0.648865	1.65195	0	0.0806033
GLUTAMATE_NEUROTRANSMITTER_RELEASE_CYCLE	22	0.500461	1.61238	0	0.108723

## Sheet: Enriched in PFA
REACTOME PATHWAYS	SIZE	ES	NES	NOM p-val	FDR q-val		Gene Set Enrichment Analysis (GSEA) report
TELOMERE_C_STRAND_LAGGING_STRAND_SYNTHESIS	19	-0.610919	-2.45928	0	0		Generated with desktop version 4.0.3
NON_INTEGRIN_MEMBRANE_ECM_INTERACTIONS	55	-0.447447	-2.35351	0	0
HS_GAG_DEGRADATION	18	-0.714546	-2.29048	0	0		SIZE	Number of genes in the pathway
RESOLUTION_OF_SISTER_CHROMATID_COHESION	107	-0.536813	-2.21838	0	0		ES	Enrichment Score
HDR_THROUGH_HOMOLOGOUS_RECOMBINATION_HRR	56	-0.502718	-2.13515	0	0		NES	Normalized Enrichment Score
G1_PHASE	40	-0.511559	-2.08771	0	0
MOLECULES_ASSOCIATED_WITH_ELASTIC_FIBRES	38	-0.490124	-2.08457	0	0.0161463
RET_SIGNALING	36	-0.420177	-2.078	0	0.0145316
CHROMOSOME_MAINTENANCE	52	-0.55846	-2.05193	0	0.0132106
RHO_GTPASES_ACTIVATE_FORMINS	118	-0.473587	-2.02456	0	0.0121097
ACTIVATION_OF_ATR_IN_RESPONSE_TO_REPLICATION_STRESS	34	-0.540191	-2.01465	0	0.0111782
HEMOSTASIS	493	-0.338809	-1.98671	0	0.0103797
RHO_GTPASES_ACTIVATE_PAKS	16	-0.549374	-1.9816	0	0.00968776
MITOTIC_PROMETAPHASE	163	-0.393064	-1.97529	0	0.00908228
MITOTIC_SPINDLE_CHECKPOINT	99	-0.441196	-1.97077	0	0.00854803
PLATELET_ACTIVATION_SIGNALING_AND_AGGREGATION	224	-0.379485	-1.96491	0	0.00807314
NUCLEOSOME_ASSEMBLY	24	-0.640116	-1.96183	0	0.00764823
COMPLEMENT_CASCADE	37	-0.53536	-1.95046	0	0.00726582
SIGNALING_BY_PDGF	55	-0.44508	-1.93549	0	0.00691983
REGULATION_OF_INSULIN_LIKE_GROWTH_FACTOR_IGF_TRANSPORT_AND_UPTAKE_BY_INSULIN_LIKE_GROWTH_FACTOR_BINDING_PROTEINS_IGFBPS	110	-0.404202	-1.91828	0	0.00660529
RESPONSE_TO_ELEVATED_PLATELET_CYTOSOLIC_CA2PLUS	116	-0.402486	-1.91806	0	0.00631811
HS_GAG_BIOSYNTHESIS	27	-0.614446	-1.89739	0	0.00605485
RHO_GTPASE_EFFECTORS	227	-0.399667	-1.87781	0	0.00581266
GLUCAGON_LIKE_PEPTIDE_1_GLP1_REGULATES_INSULIN_SECRETION	31	-0.499249	-1.85775	0	0.00558909
G2_M_DNA_DAMAGE_CHECKPOINT	52	-0.492069	-1.84971	0	0.00538209
LAGGING_STRAND_SYNTHESIS	17	-0.594487	-1.84022	0	0.00518987
NCAM1_INTERACTIONS	38	-0.469322	-1.83498	0	0.00501091
TP53_REGULATES_TRANSCRIPTION_OF_GENES_INVOLVED_IN_G2_CELL_CYCLE_ARREST	15	-0.594661	-1.8281	0	0.00484388
DNA_STRAND_ELONGATION	28	-0.659943	-1.82535	0	0.00468763
INITIAL_TRIGGERING_OF_COMPLEMENT	15	-0.607385	-1.82184	0	0.00454114
COLLAGEN_FORMATION	83	-0.435124	-1.81972	0	0.00440353
DNA_DOUBLE_STRAND_BREAK_REPAIR	110	-0.385872	-1.819	0	0.00427401
HDR_THROUGH_SINGLE_STRAND_ANNEALING_SSA	34	-0.573012	-1.81841	0	0.0041519
RESOLUTION_OF_D_LOOP_STRUCTURES_THROUGH_SYNTHESIS_DEPENDENT_STRAND_ANNEALING_SDSA	22	-0.650437	-1.80836	0	0.00403657
VEGFR2_MEDIATED_VASCULAR_PERMEABILITY	26	-0.5086	-1.80579	0	0.00392747
SYNDECAN_INTERACTIONS	26	-0.580559	-1.80393	0	0.00382412
ELASTIC_FIBRE_FORMATION	45	-0.46111	-1.80068	0	0.00372606
CHONDROITIN_SULFATE_DERMATAN_SULFATE_METABOLISM	44	-0.457852	-1.80035	0	0.00363291
MITOTIC_G1_G1_S_PHASES	126	-0.410792	-1.78912	0	0.0035443
SIGNAL_AMPLIFICATION	22	-0.601522	-1.77854	0	0.00345992
LAMININ_INTERACTIONS	26	-0.624741	-1.77517	0	0.00337945
SIGNALING_BY_NTRK2_TRKB	24	-0.401541	-1.77481	0	0.00330265
NEUTROPHIL_DEGRANULATION	369	-0.350348	-1.77295	0	0.00322925
ASSEMBLY_OF_COLLAGEN_FIBRILS_AND_OTHER_MULTIMERIC_STRUCTURES	57	-0.497571	-1.769	0	0.00315905
SIGNALING_BY_BMP	28	-0.539915	-1.76589	0	0.00309184
COPI_INDEPENDENT_GOLGI_TO_ER_RETROGRADE_TRAFFIC	41	-0.478947	-1.76494	0	0.00302743
CELL_CYCLE_CHECKPOINTS	225	-0.396396	-1.75925	0	0.00296564
FORMATION_OF_TUBULIN_FOLDING_INTERMEDIATES_BY_CCT_TRIC	17	-0.573294	-1.75343	0	0.00290633
G0_AND_EARLY_G1	23	-0.410662	-1.75118	0	0.00284934
ACTIVATION_OF_THE_PRE_REPLICATIVE_COMPLEX	25	-0.591931	-1.75096	0	0.00279455
